# Supplementary material for: Development and Internal Validation of a Risk Prediction Model to Identify Myeloma Based on Routine Blood Tests: A Case-Control Study
Source: MDPI journal article supplement (doi:10.3390/cancers15030975), 2023-02-03

## Supplementary tables and figures

**Table S1: Number of tests available up to 5-year prior to index date for myeloma patients, MGUS patients and controls**

| Blood test         | Number tests | Myeloma<br>Number patients | Median tests per patient | Number tests | MGUS<br>Number patients | Median tests per patient | Number tests | Controls<br>Number patients | Median tests per patient |
|--------------------|--------------|----------------------------|--------------------------|--------------|-------------------------|--------------------------|--------------|-----------------------------|--------------------------|
| Albumin            | 4992         | 409                        | 9                        | 4493         | 392                     | 8                        | 11967        | 1418                        | 5                        |
| ALP                | 4177         | 409                        | 7                        | 3958         | 392                     | 7                        | 11953        | 1418                        | 5                        |
| ALT                | 3724         | 408                        | 6                        | 3621         | 391                     | 6                        | 11179        | 1413                        | 4                        |
| APTT               | 1174         | 292                        | 2                        | 783          | 220                     | 2                        | 4497         | 958                         | 2                        |
| Basophil           | 4887         | 408                        | 8                        | 4675         | 392                     | 8                        | 16399        | 1493                        | 5                        |
| Calcium            | 2134         | 400                        | 3                        | 1928         | 382                     | 3                        | 5042         | 960                         | 2                        |
| Creatinine         | 5655         | 411                        | 9                        | 5318         | 393                     | 9                        | 18489        | 1488                        | 6                        |
| CRP                | 2304         | 365                        | 3                        | 2112         | 330                     | 3                        | 9120         | 1092                        | 4                        |
| D-Dimer            | 89           | 71                         | 1                        | 63           | 46                      | 1                        | 239          | 161                         | 1                        |
| Derived Fibrinogen | 1083         | 291                        | 2                        | 737          | 218                     | 2                        | 4075         | 949                         | 2                        |
| eGFR               | 5390         | 411                        | 9                        | 5004         | 393                     | 9                        | 17688        | 1487                        | 6                        |
| Eosinophil         | 4928         | 409                        | 8                        | 4707         | 392                     | 8                        | 16469        | 1493                        | 5                        |
| ESR                | 152          | 96                         | 1                        | 226          | 132                     | 1                        | 330          | 199                         | 1                        |
| Haemoglobin        | 5038         | 409                        | 8                        | 4783         | 392                     | 8                        | 17600        | 1493                        | 5                        |
| Hypochromic        | 4948         | 409                        | 8                        | 4712         | 392                     | 8                        | 16498        | 1493                        | 5                        |
| INR                | 2215         | 301                        | 3                        | 2153         | 236                     | 2                        | 8475         | 986                         | 3                        |
| LDH                | 280          | 186                        | 1                        | 311          | 219                     | 1                        | 172          | 90                          | 1                        |
| Lymphocyte         | 4981         | 409                        | 8                        | 4741         | 392                     | 8                        | 16665        | 1493                        | 5                        |
| MCV                | 4940         | 409                        | 8                        | 4698         | 391                     | 8                        | 16462        | 1493                        | 5                        |
| MCH                | 4986         | 409                        | 8                        | 4730         | 391                     | 8                        | 16638        | 1493                        | 5                        |
| Monocyte           | 4975         | 409                        | 8                        | 4739         | 392                     | 8                        | 16653        | 1493                        | 5                        |
| Neutrophil         | 4984         | 409                        | 8                        | 4744         | 392                     | 8                        | 16683        | 1493                        | 5                        |
| PCV                | 4957         | 409                        | 8                        | 4705         | 391                     | 8                        | 16521        | 1493                        | 5                        |
| Platelets          | 4998         | 409                        | 8                        | 4742         | 392                     | 8                        | 16642        | 1493                        | 5                        |
| Prothrombin Time   | 1091         | 291                        | 2                        | 755          | 218                     | 2                        | 4188         | 957                         | 2                        |
| PV                 | 539          | 275                        | 2                        | 655          | 274                     | 2                        | 754          | 402                         | 1                        |
| RDW                | 4973         | 409                        | 8                        | 4723         | 391                     | 8                        | 16583        | 1493                        | 5                        |
| RBC                | 4996         | 409                        | 8                        | 4734         | 391                     | 8                        | 16668        | 1493                        | 5                        |
| Urea               | 5577         | 411                        | 9                        | 5303         | 393                     | 9                        | 18464        | 1488                        | 6                        |
| Urine Creatinine   | 1027         | 329                        | 2                        | 1228         | 365                     | 2                        | 1327         | 423                         | 2                        |
| Vitamin D          | 220          | 131                        | 1                        | 316          | 156                     | 1                        | 579          | 293                         | 1                        |
| WCC                | 5008         | 409                        | 8                        | 4754         | 392                     | 8                        | 16717        | 1493                        | 5                        |

This table include all tests initially considered for this study

Abbreviations: ALP = alkaline phosphatase , ALT = alanine transaminase, APTT = activated partial thromboplastin time, CRP = C-reactive protein, eGFR = estimated glomerular filtration rate, ESR = erythrocyte sedimentation rate, INR = international normalised ratio, LDH = lactate dehydrogenase, MCV = mean cell volume, MCH = mean cell haemoglobin, PCV = packed cell volume, PV = plasma viscosity, RDW = red cell distribution width, RBC = red blood cell count, WCC = white cell count

**Table S2: Candidate predictors variables included in model development**

| <b>Predictor variable</b>   | <b>Units</b>       | <b>Variable Type</b>  |
|-----------------------------|--------------------|-----------------------|
| Age at diagnosis/index date | Year               | Continuous            |
| Sex                         |                    | Factor (Male, Female) |
| Albumin                     | g/L                | Continuous            |
| ALP                         | iu/L               | Continuous            |
| ALT                         | iu/L               | Continuous            |
| Basophils                   | 10 <sup>9</sup> /L | Continuous            |
| Calcium                     | mmol/L             | Continuous            |
| Creatinine                  | Umol/L             | Continuous            |
| CRP                         | mg/L               | Continuous            |
| Eosinophils                 | 10 <sup>9</sup> /L | Continuous            |
| Haemoglobin                 | g/L                | Continuous            |
| Lymphocytes                 | 10 <sup>9</sup> /L | Continuous            |
| MCV                         | fL                 | Continuous            |
| Monocytes                   | 10 <sup>9</sup> /L | Continuous            |
| Neutrophils                 | 10 <sup>9</sup> /L | Continuous            |
| Platelets                   | 10 <sup>9</sup> /L | Continuous            |
| WCC                         | 10 <sup>9</sup> /L | Continuous            |

**Figure S1: Flow chart of MGUS cohort**

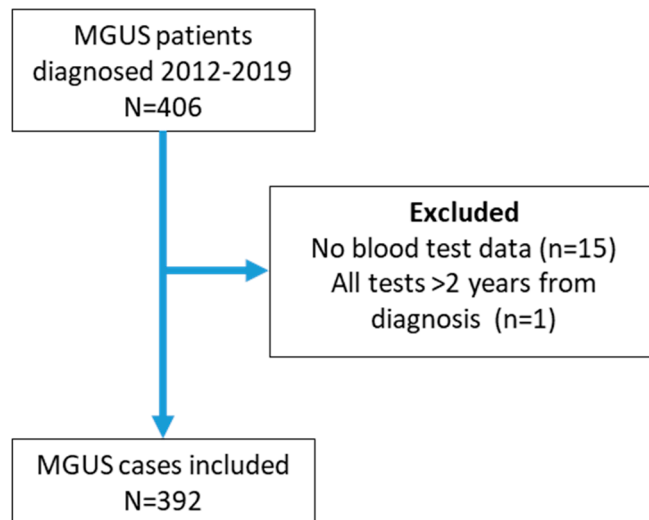

**Table S3: Baseline characteristics of MGUS cohort**

| Variable                             | MGUS cohort<br>N=392 |                |
|--------------------------------------|----------------------|----------------|
|                                      | Median (IQR) or n(%) |                |
| <b>Age</b>                           | 75                   | (66, 82)       |
| <b>Sex</b>                           |                      |                |
| Male                                 | 224                  | 57.1%          |
| Female                               | 168                  | 42.9%          |
| <b>Ethnicity</b>                     |                      |                |
| White British                        | 342                  | 87.2%          |
| Black                                | 19                   | 4.9%           |
| South Asian                          | 14                   | 3.6%           |
| Other and missing                    | 17                   | 4.3%           |
| <b>Total number of comorbidities</b> |                      |                |
| 0                                    | 266                  | 67.9%          |
| 1                                    | 86                   | 21.9%          |
| 2                                    | 34                   | 8.7%           |
| 3+                                   | 6                    | 1.5%           |
| <b>Blood tests</b>                   |                      |                |
| Albumin                              | 40.0                 | (37.0, 42.0)   |
| ALP                                  | 121.5                | (82.0, 202.0)  |
| ALT                                  | 19.0                 | (14.0, 26.0)   |
| Basophils                            | 0.04                 | (0.03, 0.05)   |
| Calcium                              | 2.39                 | (2.31, 2.45)   |
| Creatinine                           | 80.0                 | (63.0, 100.3)  |
| CRP                                  | 5.00                 | (5.0, 11.58)   |
| Eosinophils                          | 0.13                 | (0.08, 0.22)   |
| Haemoglobin                          | 131.0                | (118.0, 141.5) |
| Lymphocytes                          | 1.51                 | (1.12, 1.96)   |
| MCV                                  | 94                   | (90, 98)       |
| Monocytes                            | 0.38                 | (0.30, 0.50)   |
| Neutrophils                          | 4.16                 | (3.25, 5.40)   |
| Platelets                            | 242.0                | (189.5, 300.0) |
| WCC                                  | 6.55                 | (5.42, 8.14)   |

**Figure S2: Trend plots for blood test for cases and controls, mean values (and 95% CIs) within 90 day periods**

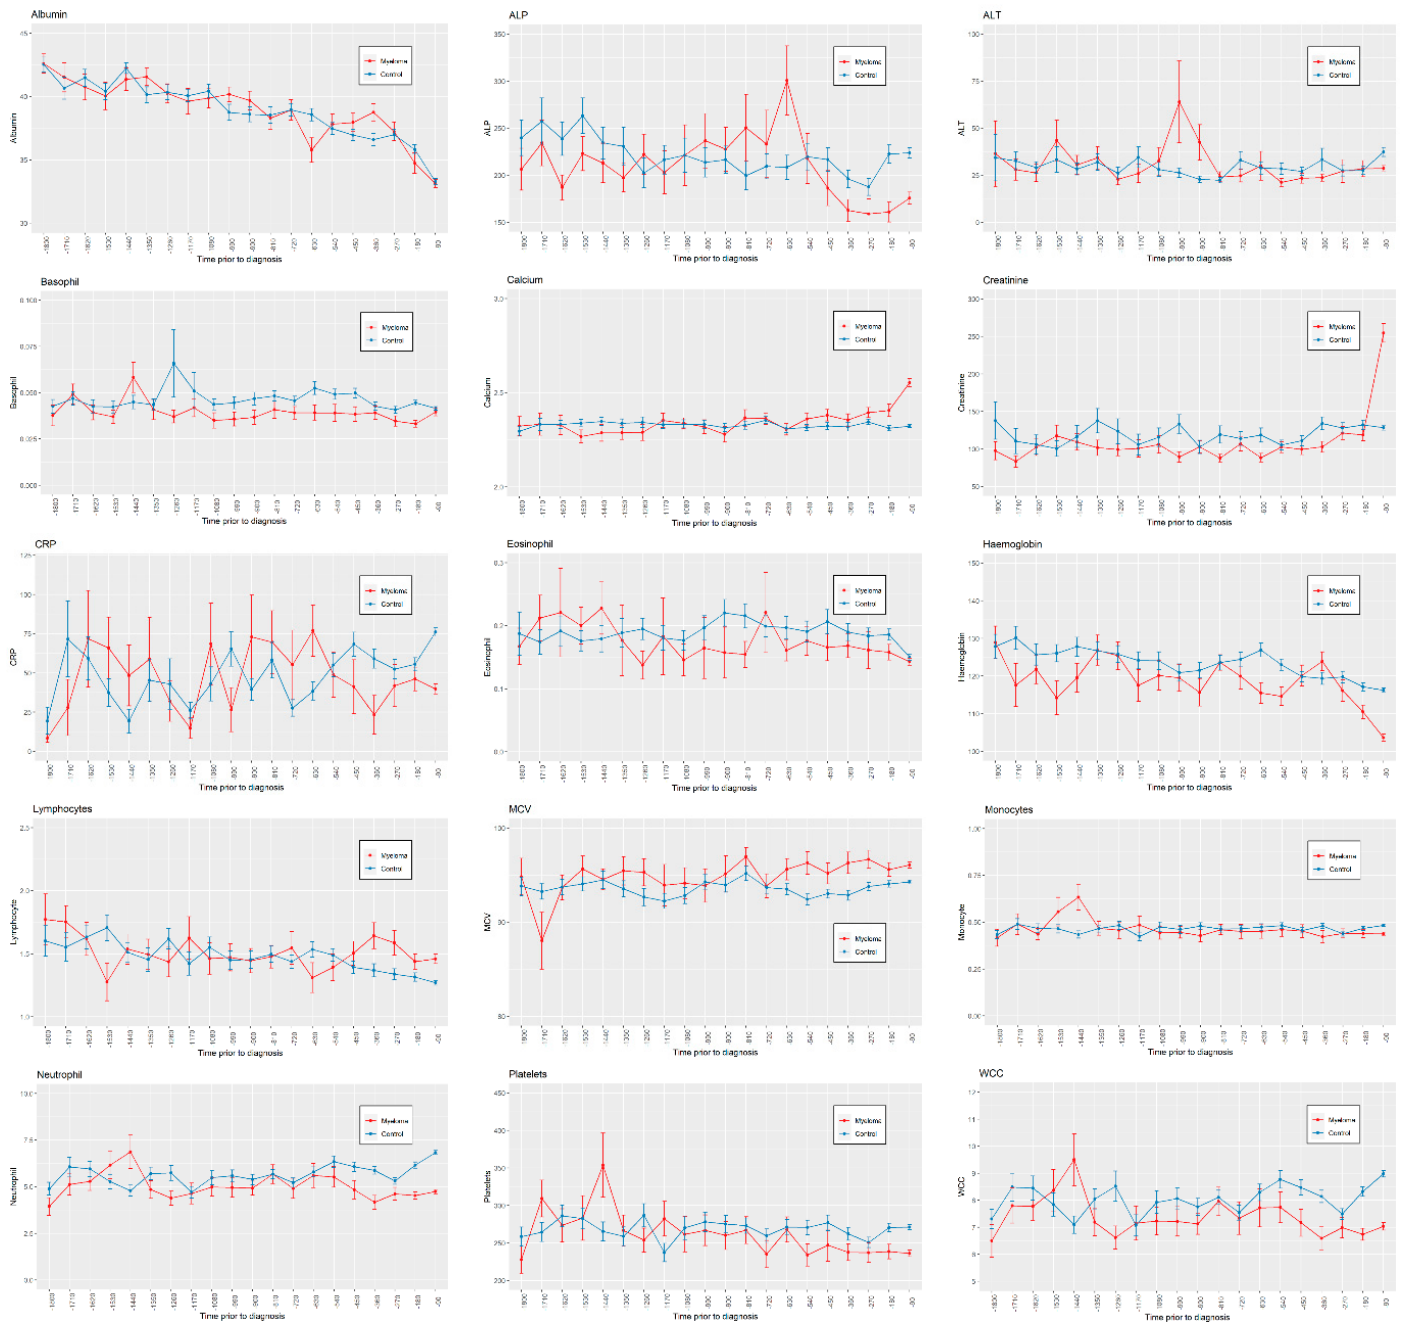

**Figure S3: Box plot of distribution of blood tests for cases and controls for test results included in the model**

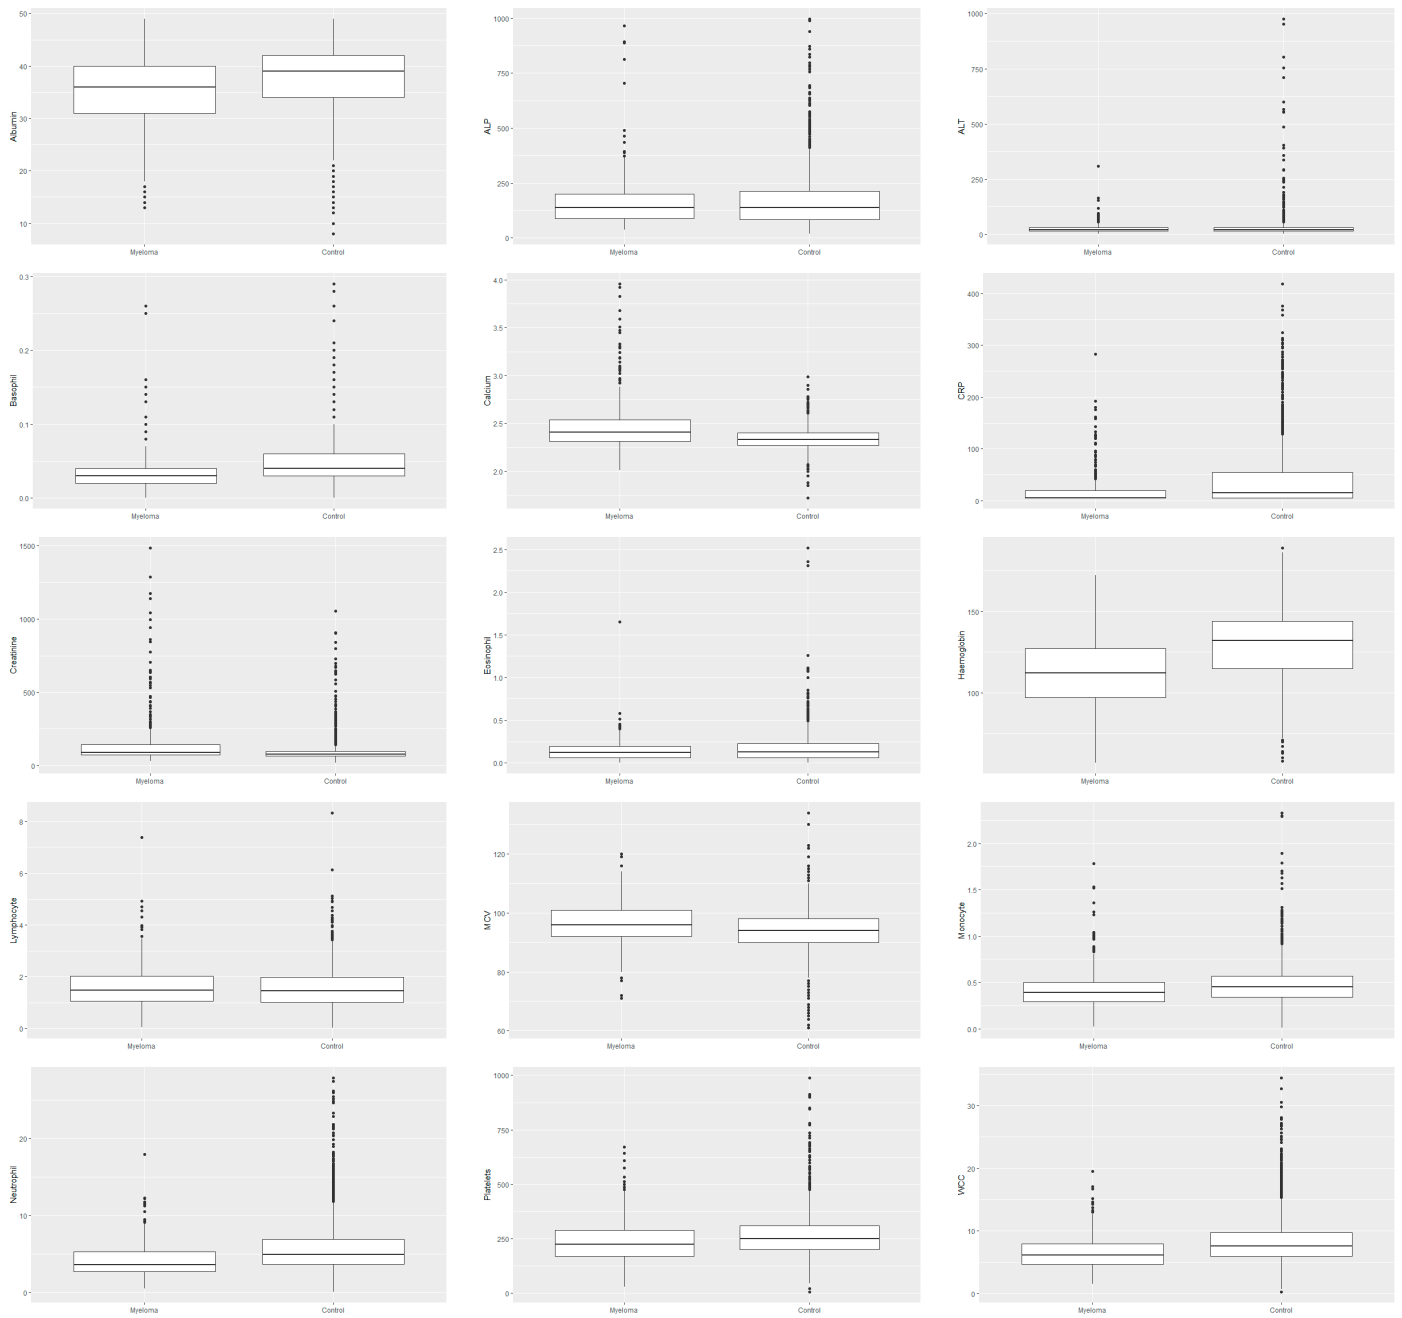

**Table S4: Most frequent requesting departments for blood test results used in model development**

| <b>Cases</b>                 |                   | <b>Controls</b>              |                   |
|------------------------------|-------------------|------------------------------|-------------------|
| <b>Requesting department</b> | <b>% of tests</b> | <b>Requesting department</b> | <b>% of tests</b> |
| Primary Care                 | 36%               | Primary Care                 | 34%               |
| Medicine                     | 19%               | Medicine                     | 15%               |
| Haematology Outpatients      | 9%                | Accident and emergency       | 9%                |
| Elderly care                 | 7%                | Cardiology                   | 8%                |
| Renal                        | 6%                | Elderly care                 | 4%                |
| Respiratory                  | 5%                | Respiratory                  | 4%                |
| Accident and emergency       | 5%                | Spinal surgery               | 4%                |
| Haematology inpatients       | 3%                | General surgery              | 3%                |
| Orthopaedics                 | 2%                | Orthopaedics                 | 3%                |
| General surgery              | 2%                | Renal                        | 2%                |

Each component of the FBC is counted as a separate test

**Table S5: Number and percentage with missing data for blood tests in cases and controls.**

| <b>Test</b> | <b>Overall</b> |          | <b>Cases</b> |          | <b>Controls</b> |          |
|-------------|----------------|----------|--------------|----------|-----------------|----------|
|             | <b>n</b>       | <b>%</b> | <b>n</b>     | <b>%</b> | <b>n</b>        | <b>%</b> |
| Albumin     | 98             | 5.3      | 8            | 2.2      | 90              | 6.0      |
| ALP         | 98             | 5.3      | 8            | 2.2      | 90              | 6.0      |
| ALT         | 110            | 5.9      | 15           | 4.1      | 95              | 6.4      |
| Basophil    | 18             | 1.0      | 12           | 3.3      | 6               | 0.4      |
| Calcium     | 656            | 35.4     | 60           | 16.3     | 596             | 40.0     |
| Creatinine  | 11             | 0.6      | 3            | 0.8      | 8               | 0.5      |
| CRP         | 510            | 27.5     | 89           | 24.3     | 421             | 28.3     |
| Eosinophil  | 16             | 0.9      | 11           | 3.0      | 5               | 0.3      |
| Haemoglobin | 15             | 0.8      | 11           | 3.0      | 4               | 0.3      |
| Lymphocyte  | 15             | 0.8      | 11           | 3.0      | 4               | 0.3      |
| MCV         | 16             | 0.9      | 12           | 3.3      | 4               | 0.3      |
| Monocyte    | 15             | 0.8      | 11           | 3.0      | 4               | 0.3      |
| Neutrophil  | 15             | 0.8      | 11           | 3.0      | 4               | 0.3      |
| Platelets   | 15             | 0.8      | 11           | 3.0      | 4               | 0.3      |
| WCC         | 15             | 0.8      | 11           | 3.0      | 4               | 0.3      |



**Table S6: Model coefficients for final model based**

| <b>Variable</b>      | <b>Coefficient<br/>(log(OR))</b> | <b>Standard<br/>error</b> |
|----------------------|----------------------------------|---------------------------|
| Intercept            | -10.617                          | 4.401                     |
| Sex                  | -0.255                           | 0.177                     |
| Age                  | 0.006                            | 0.014                     |
| Age spline 1         | -0.017                           | 0.016                     |
| Albumin              | -0.019                           | 0.023                     |
| Albumin spline 1     | -0.006                           | 0.026                     |
| ALP                  | 0.007                            | 0.002                     |
| ALP spine 1          | -0.009                           | 0.003                     |
| ALT                  | 0.014                            | 0.015                     |
| ALT spline 1         | -0.023                           | 0.021                     |
| Basophil             | -27.403                          | 8.695                     |
| Basophil spline 1    | 21.675                           | 11.557                    |
| Calcium              | 1.922                            | 1.549                     |
| Calcium spline 1     | 3.372                            | 1.744                     |
| Creatinine           | 0.018                            | 0.006                     |
| Creatinine spline 1  | -0.024                           | 0.009                     |
| CRP                  | -0.029                           | 0.008                     |
| CRP spline 1         | 0.050                            | 0.022                     |
| Eosinophil           | -0.841                           | 2.204                     |
| Eosinophil spline 1  | -0.733                           | 2.700                     |
| Haemoglobin          | -0.023                           | 0.008                     |
| Haemoglobin spline 1 | -0.029                           | 0.010                     |
| Lymphocytes          | 1.740                            | 0.420                     |
| Lymphocytes spline 1 | -1.109                           | 0.377                     |
| MCV                  | 0.071                            | 0.025                     |
| MCV spline 1         | -0.058                           | 0.030                     |
| Monocytes            | 1.185                            | 1.259                     |
| Monocytes spline 1   | 0.747                            | 1.446                     |
| Neutrophil           | 0.150                            | 0.282                     |
| Neutrophil spline 1  | -0.271                           | 0.289                     |
| Platelets            | 0.003                            | 0.002                     |
| Platelets spine 1    | -0.003                           | 0.002                     |
| WCC                  | -0.535                           | 0.271                     |
| WCC spline 1         | 0.457                            | 0.235                     |

Restricted cubic spline knot positions:

Age: 52, 70, 84, Albumin: 28, 38, 44, ALP: 64,137, 302, ALT: 12, 21, 48, Basophil: 0.02, 0.04, 0.08, Calcium: 2.21, 2.34, 2.51, Creatinine: 54, 78, 170, CRP: 5.1, 30, 155, Eosinophil, 0.02, 0.13, 0.33, Haemoglobin: 96, 129, 153, Lymphocytes: 0.74, 1.48, 2.63, MCV: 87, 94, 103, Monocytes: 0.26, 0.43, 0.73, Neutrophil: 2.55, 4.75, 9.52, Platelets: 152, 244, 377, WCC: 4.53, 7.32, 12.35

**Figure S4: Predicted probabilities cases and controls (over imputed models)**

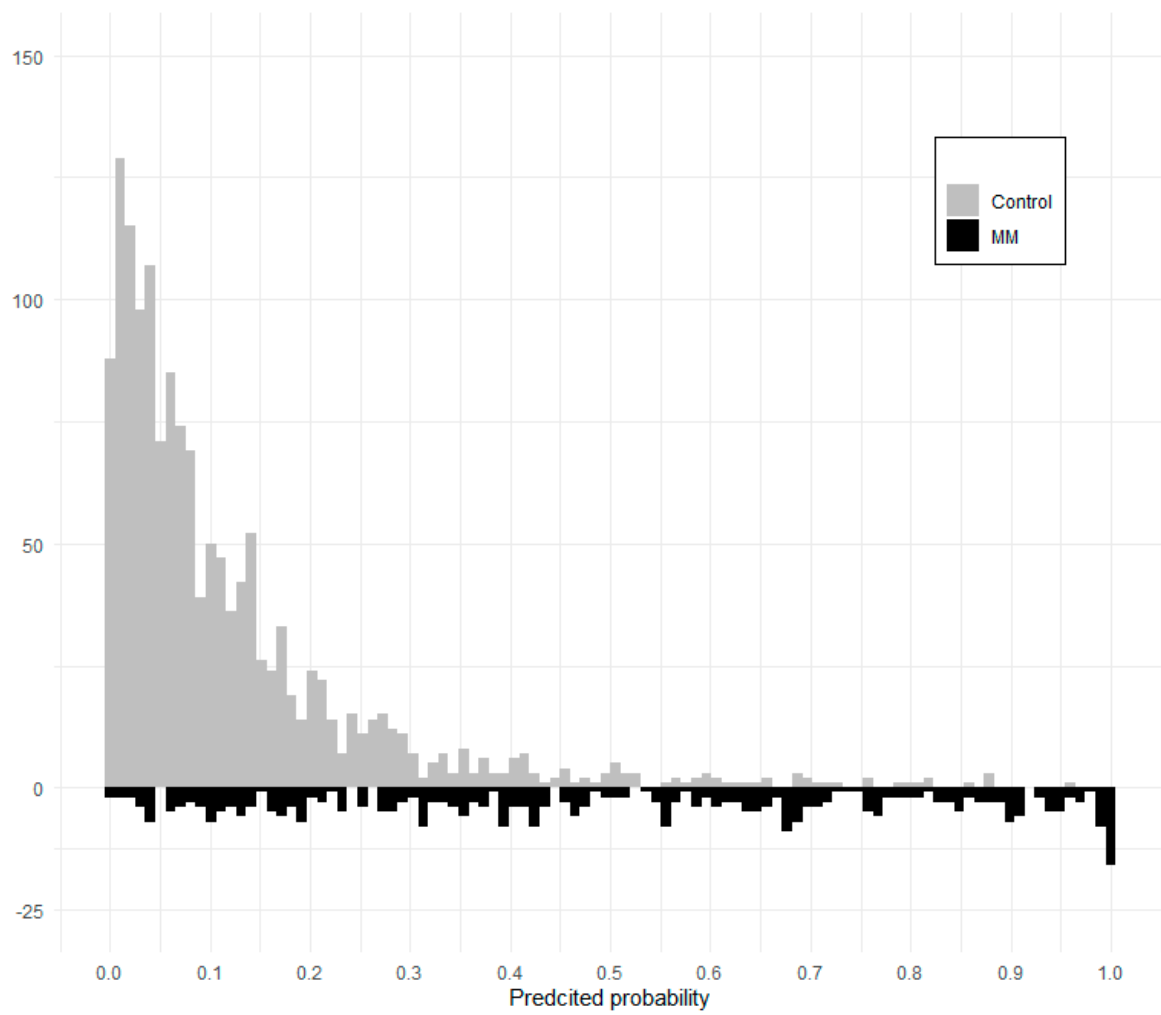

**Table S7: Estimated prevalence based on published studies and national cancer data**

| Author, year              | Study population                                                    | Estimated prevalence/incidence                                                                     |
|---------------------------|---------------------------------------------------------------------|----------------------------------------------------------------------------------------------------|
| Koshiaris et al, 2021 (1) | CRPD >40 years, registered GP for >1 year,                          | 737 cases<br>Total population 1,281,926                                                            |
|                           | Two FBCs within 1 year between 2000 and 2014 with 2 years follow-up | 57 cases per 100,000<br>(paper used 60 cases per 100,00 pop for diagnostic performance statistics) |
| Seesaghur et al, 2021 (2) | CRPD, aged 18+, registered GP for >2 years,                         | 2646 cases<br>Total population 17,756,119                                                          |
|                           | Newly diagnosed MM between 2006 and 2016                            | 15 cases per 100,000                                                                               |
| NHS Digital, 2022 (3)     | England cancer registrations 2019                                   | Age standardised incidence rate<br>Males 12.9 per 100,000                                          |
|                           | All ages                                                            | Females 8.2 per 100,000                                                                            |

## References

1. Koshiaris C, Van den Bruel A, Nicholson BD, Lay-Flurrie S, Hobbs FR, Oke JL. Clinical prediction tools to identify patients at highest risk of myeloma in primary care: a retrospective open cohort study. Br J Gen Pract. 2021;71(706):e347-e55.
2. Seesaghur A, Petruski-Ivleva N, Banks VL, Wang JR, Abbasi A, Neasham D, et al. Clinical features and diagnosis of multiple myeloma: a population-based cohort study in primary care. BMJ Open. 2021;11(10):e052759.
3. National Disease Registration Service NHS Digital. CancerData. Cancer Incidence 2019. [https://www.cancerdata.nhs.uk/incidence\\_and\\_mortality](https://www.cancerdata.nhs.uk/incidence_and_mortality) 2022

**Table S8: Total number to additionally test at different prevalence estimates and probability thresholds for each model**

| Model                                            | Threshold | Prevalence per 100,000 |       |       |
|--------------------------------------------------|-----------|------------------------|-------|-------|
|                                                  |           | 10                     | 15    | 60    |
| Full model                                       | 0.1       | 39805                  | 39808 | 39830 |
|                                                  | 0.2       | 17706                  | 17709 | 17736 |
|                                                  | 0.4       | 5205                   | 5208  | 5232  |
| Calcium removed                                  | 0.1       | 44404                  | 44407 | 44427 |
|                                                  | 0.2       | 21506                  | 21508 | 21534 |
|                                                  | 0.4       | 5805                   | 5807  | 5830  |
| Over 60s only                                    | 0.1       | 38405                  | 38408 | 38432 |
|                                                  | 0.2       | 19406                  | 19409 | 19337 |
|                                                  | 0.4       | 5706                   | 5709  | 5736  |
| MGUS as controls                                 | 0.1       | 36105                  | 36107 | 36129 |
|                                                  | 0.2       | 14006                  | 14009 | 14136 |
|                                                  | 0.4       | 4004                   | 4006  | 4026  |
| MGUS as controls and calcium removed             | 0.1       | 40604                  | 40607 | 40627 |
|                                                  | 0.2       | 17205                  | 17208 | 17233 |
|                                                  | 0.4       | 4304                   | 4306  | 4324  |
| Over 60s only, MGUS as controls, all predictors  | 0.1       | 36005                  | 36008 | 36031 |
|                                                  | 0.2       | 15406                  | 15409 | 15436 |
|                                                  | 0.4       | 5104                   | 5107  | 5126  |
| Over 60s only, MGUS as controls, calcium removed | 0.1       | 39305                  | 39307 | 39329 |
|                                                  | 0.2       | 18506                  | 18508 | 18634 |
|                                                  | 0.4       | 5404                   | 5406  | 5426  |

**Figure S5: Number needed to additionally test to diagnose 1 case at different prevalence estimates and probability thresholds for each model**

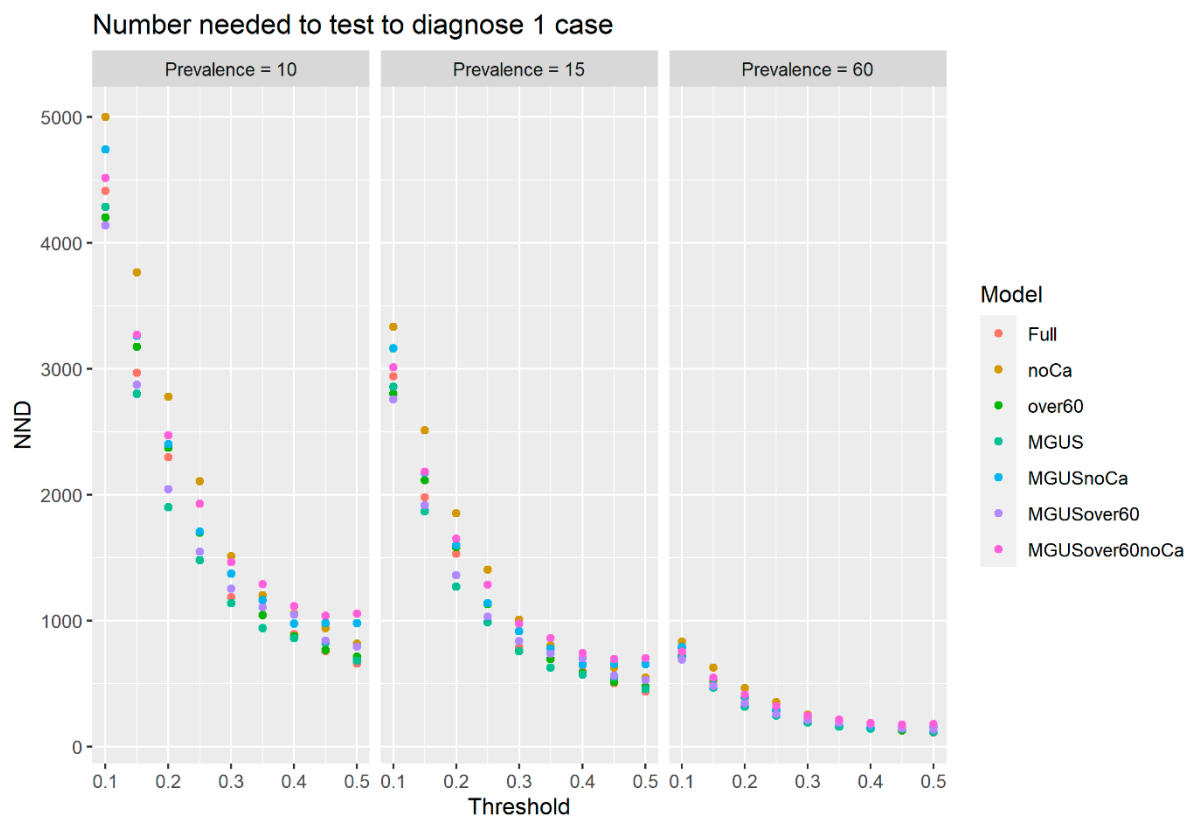

Supplement: s1 [file s1]
